# Supplementary material for: Marine-Derived Fungi as a Valuable Resource for Amylases Activity Screening
Source: MDPI journal article supplement (doi:10.3390/jof9070736), 2023-07-09
Supplement: s1 [file s1]

# Marine-Derived Fungi as a Valuable Resource for Amylases Activity Screening

Di Zhang <sup>1</sup>, Lan Liu <sup>1,2</sup> and Bi-Shuang Chen <sup>1,2,\*</sup>

<sup>1</sup> School of Marine Sciences, Sun Yat-sen University, Zhuhai 519080, China

<sup>2</sup> Southern Marine Science and Engineering Guangdong Laboratory (Zhuhai), Zhuhai 519080, China

\* Correspondence: chenbsh23@mail.sysu.edu.cn; Tel.: +86-0756-3668775

**Table S1.** Information of the amylase-producing fungus strains

| NO.  | Fungi                              | NO.  | Fungi                        |
|------|------------------------------------|------|------------------------------|
| 8070 | <i>Aspergillus niger</i>           | 9176 | <i>Aspergillus terreus</i>   |
| 8078 | <i>Aspergillus sydowii</i>         | 9177 | <i>Aspergillus oryzae</i>    |
| 8081 | <i>Pezizomycotina</i> sp.          | 9184 | <i>Aspergillus niger</i>     |
| 8082 | <i>Ascomycota</i> sp.              | 9194 | <i>Aspergillus</i> sp.       |
| 8084 | <i>Aspergillus</i> sp.             | 9197 | <i>Aspergillus niger</i>     |
| 8085 | <i>Aspergillus sydowii</i>         | 9198 | <i>Aspergillus</i> sp.       |
| 8087 | <i>Pezizomycotina</i> sp.          | 9199 | <i>Aspergillus nomiae</i>    |
| 8089 | <i>Penicillium chrysogenum</i>     | 9201 | <i>Aspergillus flavus</i>    |
| 8090 | <i>Aspergillus terreus</i>         | 9207 | <i>Aspergillus terreus</i>   |
| 8094 | <i>Aspergillus niger</i>           | 9211 | <i>Aspergillus flavus</i>    |
| 8100 | <i>Aspergillus sydowii</i>         | 9222 | <i>Fusarium proliferatum</i> |
| 8108 | <i>Penicillium aurantiogriseum</i> | 9224 | <i>Fusarium oxysporum</i>    |
| 8911 | <i>Aspergillus</i> sp.             | 9232 | <i>Aspergillus</i> sp.       |
| 8953 | <i>Aspergillus niger</i>           | 9244 | <i>Parengyodontium album</i> |
| 8972 | <i>Neodeighonia subglobosa</i>     | 9245 | <i>Fusarium nirenbergiae</i> |
| 8975 | <i>Aspergillus terreus</i>         | 9261 | <i>Aspergillus flavus</i>    |
| 8990 | <i>Aspergillus niger</i>           | 9263 | <i>Aspergillus flavus</i>    |
| 9003 | <i>Parengyodontium album</i>       | 9264 | <i>Parengyodontium album</i> |
| 9029 | <i>Aspergillus niger</i>           | 9266 | <i>Aspergillus</i> sp.       |

|      |                                  |      |                               |
|------|----------------------------------|------|-------------------------------|
| 9030 | <i>Aspergillus oryzae</i>        | 9267 | <i>Fusarium oxysporum</i>     |
| 9033 | <i>Fusarium solani</i>           | 9269 | <i>Fusarium oxysporum</i>     |
| 9048 | <i>Aspergillus tubingensis</i>   | 9273 | <i>Aspergillus versicolor</i> |
| 9053 | <i>Meyerozyma caribbica</i>      | 9277 | <i>Trichoderma</i> sp.        |
| 9055 | <i>Fusarium solani</i>           | 9278 | <i>Fusarium oxysporum</i>     |
| 9060 | <i>Neodeigh-tonia subglobosa</i> | 9279 | <i>Fusarium oxysporum</i>     |
| 9066 | <i>Saccharomyces cerevisiae</i>  | 9288 | <i>Fusarium oxysporum</i>     |
| 9116 | <i>Parengyodontium album</i>     | 9289 | <i>Fusarium oxysporum</i>     |
| 9171 | <i>Fusarium nirenbergiae</i>     | 9294 | <i>Aspergillus phoenicis</i>  |
| 9172 | <i>Aspergillus nomiae</i>        |      |                               |

---
